# Supplementary material for: Mass changes of the northern Antarctic Peninsula Ice Sheet derived from repeat bi-static SAR acquisitions for the period 2013–2017
Source: Copernicus journal article supplement (doi:10.5194/tc-2022-251), 2023-02-01
Supplement: Supplementary file [file tc-2022-251-AC2-supplement.pdf]

## Answers to Reviewer 2:

**First of all we want to thank the reviewer for constructive comments on our manuscript. All comments have been taken into account and a list of answers and undertaken actions is given below. Answers are marked in “blue”**

**NOTE: For better clarification of the answers, we added the new figures from the supplement at the end of this document, since we need to upload the revised manuscript and the supplement at a later stage.**

Comments by Reviewer 2:

This study describes the derivation of elevation and mass changes for the entire northern Antarctic Peninsula between 2013 and 2017 based on bistatic interferometric SAR data from the TanDEM-X mission. Using a regional climate model, information on climate mass balance have been related to derived geodetic mass balance estimates in order to identify potential drivers of melt.

In general, this study is of interest, since information on elevation and mass change for the Antarctic Peninsula at such high spatial resolution could contribute to a better understanding of the interactions between climate warming and the dynamics of the Antarctic Ice Sheet.

However, the manuscript raises many questions about the data and methodology as well as considerable concerns about the validity of the results. One of the main problems of this study is the lack of quantitative validation of the derived elevation data. A detailed interpretation of the results, as well as the linkage with climate models (as in Section 4) only appears meaningful if the validity of the previously derived results on elevation change have been verified. Therefore, I cannot recommend this manuscript in its present form for publication in The Cryosphere. I suggest that the authors seriously address the following issues before re-submission:

1. In general, the input data and the methodology are described insufficiently in many parts of Section 2 and Section 3. There is no detailed information provided regarding the acquisition parameters (e.g. acquisition time, incidence angle, orbit, beam) of the TanDEM-X data. However, this information is of great interest for assessing the accuracy of the elevations represented by the mosaics. It would also be very helpful to provide an overview of the TanDEM-X footprints in Figure 2.

According to the reviewer comment, we added a table of all used TanDEM-X data as supplement. The table contains information regarding acquisition time, incidence angle, orbit, beam/strip as well as interferometric parameters like effective baseline and height of ambiguity. Moreover we added the respective TanDEM-X foot prints in Figure 2c) and d) as requested also further below. Regarding the adjustments in Section 2 and 3 see below.

2. The description of the DEM generation (p.4, l120) is insufficient and far too short and the individual processing steps are not comprehensible for the reader. I suggest to include in a more detailed description of the interferometric SAR processing, possibly in combination with a flowchart.

We followed the reviewers suggestions and added a more detailed description of the interferometric SAR processing, even-though it does not differ from the linked literature (Sommer et al. 2022) and citations there in.

The following section was added:

“... The phase-to-height sensitivity is computed by means of a simulated differential interferogram derived from the refDEM and the refDEM lowered by 100 m. Subsequently the unwrapped differential interferogram based on the TDX is data is converted to a differential elevation map by applying the derived phase-to-height sensitivity information. Finally, the height information of the refDEM is added to compute absolute heights and the resulting DEM is orthorectified and geocoded....”

3. Generation of such large mosaics covering the entire Antarctic Peninsula faces numerous challenges, as the authors confirm (lack of ice-free stable terrain for co-registration, mosaicking of multiple coverages in overlapping areas, treatment of height offsets between the individual DEMs, etc.). In this regard, it is indispensable to establish the accuracy of the derived elevation data through quantitative validation using independent height measurements and to address the horizontal and vertical accuracy of the whole mosaic and its limitations. However, a quantitative validation is completely missing. Consequently, the reliability of the results is in question. For validation purposes, time stamped REMA strips or IceBridge data might be a useful source of reference heights.

We understand the reviewers concerns and included an evaluation of the derived TanDEM-X DEM heights using independent measurements. Since the Tandem-X data used withing this study was acquired during austral-winter there exists no contemporaneous IceBridge and only very limited contemporaneous time stamped REMA data.

A detailed description of the evaluation and additional figures are added as supplement to the manuscript, with respective cross-links and statements in the main manuscript. A brief description is added in the following:

Comparison to IceBridge IDHDT4 data (similar to Rott et al. (2018):

IceBridge IDHDT4 surface elevation change rate data from a longer and shifted observation period (2011-2016) was employed. The IDHDT4 data covers only limited sections of our study area (Fig. S1). Similar to Rott et al. (2018), longitudinal profiles of outlet glaciers were selected, and very crevassed or steep slope areas and regions affected by front position changes were masked out. In contrast to Rott et al. (2018) our observation period did not fit the IceBridge IDHDT4 period. Consequently, considerable offsets between TanDEM-X and IDHDT4 dh/dt measurements are revealed at some glaciers with dynamic change rates. Consequently, these glaciers were not considered in the comparison of elevation change rates from TanDEM-X (2013-2017) and IDHDT4 (2011-2016). In total 1592 samples were evaluated. In Figure S1 the spatial distribution and the elevation change rate offsets between both datasets is illustrated. The scatter plot in Figure S2 illustrates the concordance of the dh/dt measurements. A mean offset of 0.12 m/a and a RMSE of 0.337 m/a is obtained. Both values are higher than the findings revealed by Rott et al. (2018) (mean offset of -0.08 m/a and RMSE of 0.20 m/a). However, in contrast to Rott et al. (2018), there is a

temporal difference between both elevation change rate data sets for this study, most likely explaining the more pronounced differences as compared to Rott et al. (2018).

#### Comparison to time stamped REMA DEMs:

Contemporaneous time stamped REMA tiles for both TanDEM-X acquisition periods were downloaded a 2 m spatial resolution and bi-linearly resampled to the resolution of the TanDEM-X data (30 m). A temporal threshold of maximum 30 days between the individual TanDEM-X acquisitions and the REMA data was applied. Subsequently, the provided REMA bitmask were applied to remove unreliable or interpolated information. Subsequently, the REMA DEM tiles were coregistered following the approach used for the TanDEM-X raw DEMs. Finally, the offset between the REMA and TanDEM-X surface elevation data sets were computed.

The REMA DEM coverages for both periods (2013 and 2017) do not overlap. Consequently, we analyzed each period independently. In Figure S4 the hypsometric distribution of the offsets are illustrated. Negative values indicate that TanDEM-X heights were below the REMA surface, which serves as an indicator for SAR signal penetration. The offsets between REMA and TanDEM-X in 2013 show no trend with elevation, where as for 2017 an slight trend towards higher offsets in regions above ~1800 m a.s.l. is visible. This finding supports our assumption of a potential SAR signal penetration offset between both acquisitions for elevated regions. (Note: The offsets are measured at different locations and thus SAR signal penetration offset between our TanDEM-X coverage in 2013 and 2017 can not be derived from this data, since the SAR signal penetration can vary strongly on spatial scales, e.g. due to different accumulation rates or melt rates).

However, we concluded, that the TanDEM-X and REMA surface elevations agree quite well (<1 m average offset, which we attribute to SAR signal penetration) for both periods, demonstrating the suitability of our TanDEM-X DEMs as elevation information source for the study region.

4. Another important point that receives far too little attention in the manuscript is the elevation bias due to signal penetration, which can have enormous effects on the accuracy of the elevation and mass changes. There are several studies demonstrating a significant bias in TanDEM-X elevation data due to signal penetration (Rizzoli et al., 2017; Abdullahi et al., 2019; Fischer et al., 2019, 2020; Rott et al., 2021; Wessel et al., 2021). Some studies suggest substantial seasonal variation in signal penetration from elevation, but also from year to year (e.g., from winter to winter, as in the present study). The assumption of a linear increase of the penetration bias above a certain altitude presumably cannot adequately reflect the complex interaction between (sub-)surface structures and continuously changing acquisition geometry. In this context, the validity of penetration correction model has to be demonstrated using independent reference data.

As mentioned in the previous comment. There exists only limited contemporaneous, interdependent height data, which fits to the used TanDEM-X acquisitions from austral winters 2013 and 2017. The SAR signal penetration can vary on regional scales depending on different climatic settings (e.g. local accumulation rates). Unfortunately, the independent height data covers different regions in 2013 and 2017, hampering a meaningful assessment of the SAR signal penetration differences between both TanDEM-X acquisition periods. Consequently, the assessment or validation of our applied correction for the SAR signal penetration for our used TanDEM-X acquisitions is not possible using other height sources, and we applied the approach also used in previous analyses.

5. In addition, the authors have made some assumptions without demonstrating their validity:
- **p.3, line 84f:** The authors argue negligible signal penetration when comparing winter season data and refer to a study from Rott et al. (2018). However, this study points out that the negligibility of signal penetration is due to the same acquisition geometry (similar incidence angle, orbit and beam) of the TanDEM-X data, which is supported by the similarity of the backscatter coefficients of the individual scenes. It would be a possibility to analyze the backscatter coefficients of the used data to make a statement about the similarity of the backscatter behavior and thus the signal penetration.

As suggested by the reviewer, we carried out an analysis of the SAR backscatter for both acquisition periods. We carried out a similar analysis as done by Sommer et al. (2022) and plotted the distribution on the SAR backscatter vs. elevation (see supplement). In Figure S5 the hypsometric distributions of the mean SAR backscatter values are illustrated for both acquisition periods. Both plots show a similar distribution with an increased offset towards higher elevations (above ~1800 m a.s.l.), supporting our assumption of a potential SAR signal penetration bias at higher elevations. Thus, we conclude that the assumption of negligible signal penetration differences for acquisitions from winter season, following Rott et al. (2018), is valid for the lower sections of our study site, where we did not apply any correction.

- **p.5, lines 145-148:** Considering Figures 2a, c, and d, structures can certainly be guessed at, which are due to elevation differences caused by the different penetration biases in the individual DEMs. Integrating the footprints of the individual DEMs in Figure 2 would be important to support the authors' statement, rather than just saying that 'the pattern does not match the outline of the individual DEMs'.

As requested by the reviewer, we added the footprints of the individual DEMs in Figure 2c and d.

- **p.6, lines 165ff:** How do the authors conclude that signal penetration increases linearly between 1800 and 2400 m a.s.l.? What about the areas below and above this altitude level? Are these assumptions based on experience, analysis of data, other studies based on interferometric X-band SAR data conducted on the Antarctic Peninsula?

We applied a increasing correction value following previous studies on using InSAR data for geodetic mass balance measurements. We are aware, that the processes leading to differences in SAR signal penetration do not follow linear trend towards higher elevations. However, the major factor regarding SAR signal penetration is the amount of liquid water in the firn pack, which typically decreases towards higher altitudes. Consequently, we used this approach even-though it is just a rough approximation.

The upper limit was selected based on the hypsometric distribution of the ice elevations, see Figure 3. Only two small peaks stretch above this limit. Consequently, they were neglected for the definition of the upper limit. The lower bound was defined by the inspection of the elevation change patterns, see Sections 3, the comparison with REMA data and the SAR backscatter analysis (see above). Regions which are potentially affected by SAR signal penetration were identified above this

elevation. Moreover, the elevation change distribution in Figure 3 shows a clear break in slope at 1800 m. We adjusted the wording in Section 3 to be more precise.

“...Even though, solely TDX austral winter data is used in this analysis, some elevation change patterns in upper glacier regions (see Figure 1 and break in slope of the elevation change data in Figure 3, as well as the comparison to independent elevation data (Supplement section 1.2) and the analysis of the SAR backscatter signal (Supplement section 2)) seems to be caused by differences in the SAR signal penetration between the acquisitions. These areas are located at elevations above 1800 m a.s.l. covering an area of 12.306 km<sup>2</sup>, corresponding to 16.4% of 25g & 26g drainage basins. In order to correct for these potential offsets, we applied a linear increasing correction of  $dh$  for the elevation range from 1800 – 2400 m a.s.l. of up to 2 m, similar to Braun et al. (2019) or Seehaus et al. (2020a), leading to correction of the volume change by -2.76 km<sup>3</sup> and an average elevation change by 0.04 m/a (25g & 26g basins). The upper limit of 2400 m a.s.l. was chosen since only two small peaks in the southern part of the study area stretch above this limit. ...”

## References

- Abdullahi, S., Wessel, B., Huber, M., Wendleder, A., Roth, A., Kuenzer, C., 2019. Estimating Penetration-Related X-Band InSAR Elevation Bias: A Study over the Greenland Ice Sheet. *Remote Sens.*, *Remote Sensing* 11, 2903.
- Fischer, G., Jäger, M., Papathanassiou, K.P., Hajnsek, I., 2019. Modeling the Vertical Backscattering Distribution in the Percolation Zone of the Greenland Ice Sheet With SAR Tomography. *IEEE J. Sel. Top. Appl. Earth Obs. Remote Sens.*, *IEEE Journal of Selected Topics in Applied Earth Observations and Remote Sensing* 12, 4389–4405.
- Fischer, G., Papathanassiou, K.P., Hajnsek, I., 2020. Modeling and Compensation of the Penetration Bias in InSAR DEMs of Ice Sheets at Different Frequencies. *IEEE J. Sel. Top. Appl. Earth Obs. Remote Sens.*, *IEEE Journal of Selected Topics in Applied Earth Observations and Remote Sensing* 13, 2698–2707.
- Rizzoli, P., Martone, M., Rott, H., Moreira, A., 2017. Characterization of Snow Facies on the Greenland Ice Sheet Observed by TanDEM-X Interferometric SAR Data. *Remote Sens.*, *Remote Sensing* 9, 315.
- Rott, H., Scheiblauer, S., Wuite, J., Krieger, L., Floricioiu, D., Rizzoli, P., Libert, L., Nagler, T., 2021. Penetration of interferometric radar signals in Antarctic snow. *The Cryosphere* 15, 4399–4419.
- Sommer, C., Seehaus, T., Glazovsky, A., Braun, M.H., 2022. Brief communication: Increased glacier mass loss in the Russian High Arctic (2010–2017). *The Cryosphere* 16, 35–42. <https://doi.org/10.5194/tc-16-35-2022>
- Wessel, B., Huber, M., Wohlfart, C., Bertram, A., Osterkamp, N., Marschalk, U., Gruber, A., Reuß, F., Abdullahi, S., Georg, I., Roth, A., 2021. TanDEM-X PolarDEM 90 m of Antarctica: generation and error characterization. *The Cryosphere* 15, 5241–5260.

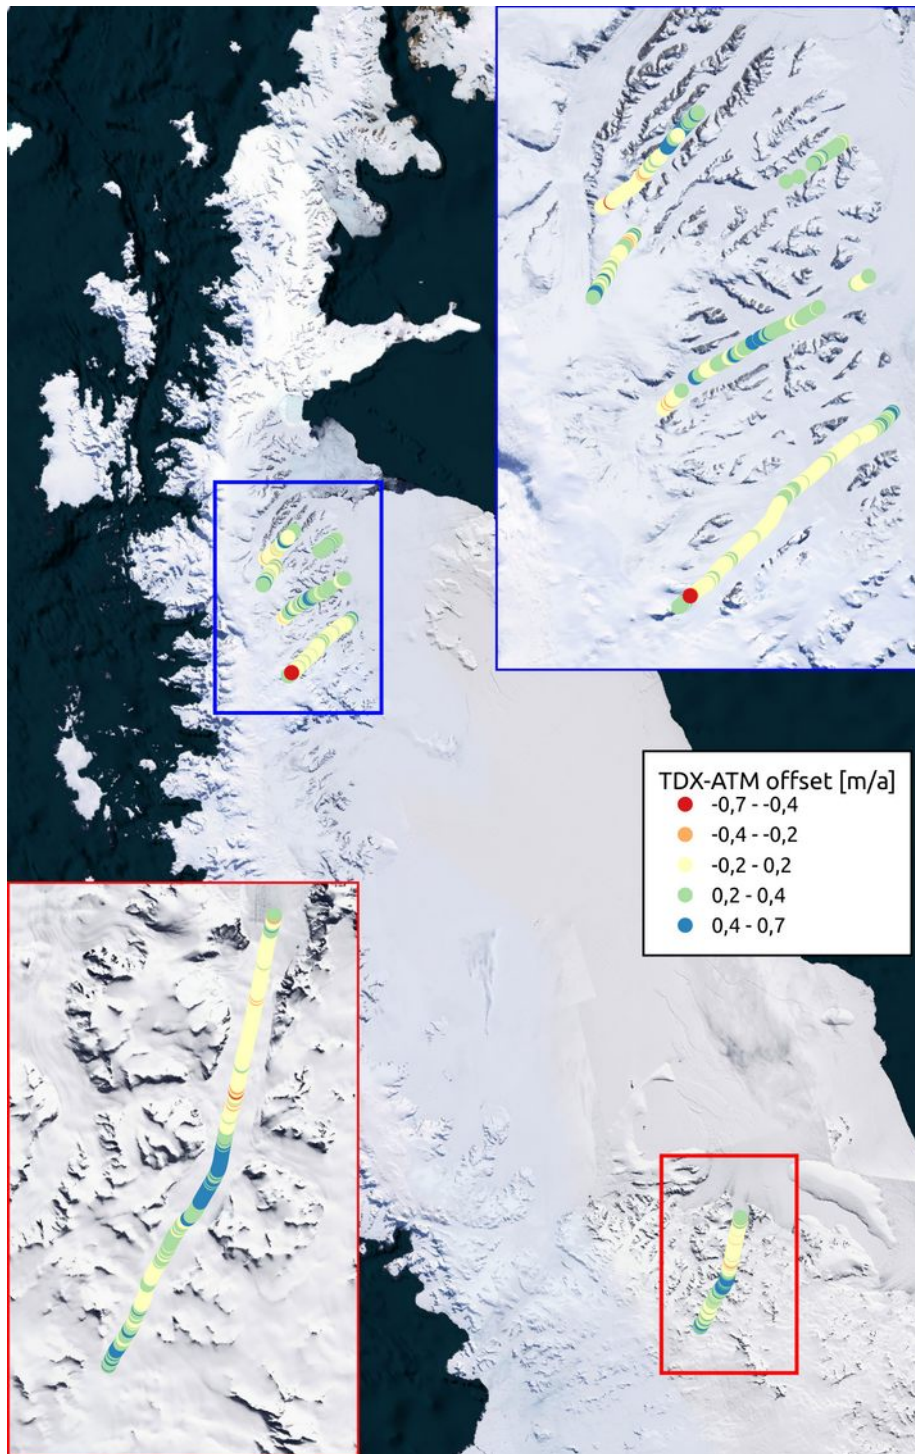

Figure S1: Spatial distribution of the offset between the TanDEM-X elevation change rates and the IceBridge ATM IDHDT4 data. Background: © Bing Satellite map by Microsoft

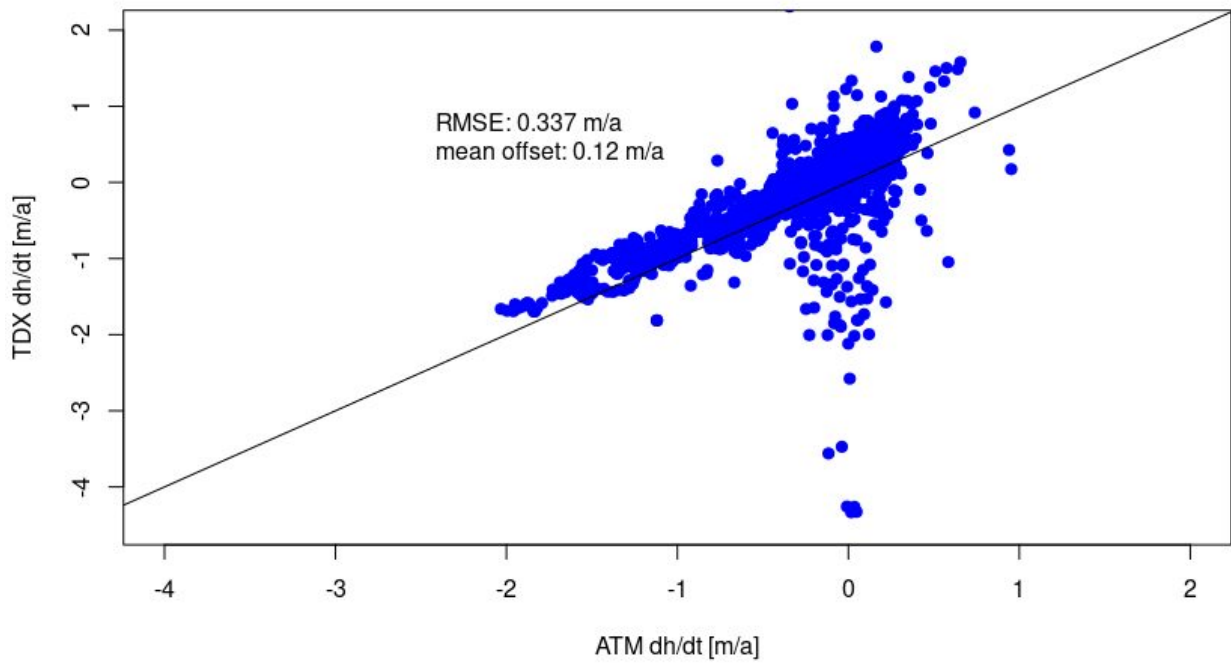

**Figure S2: Scatter plot of TanDEM-X (TDX) and IceBridge ATM IDHDT4 elevation change measurements.**

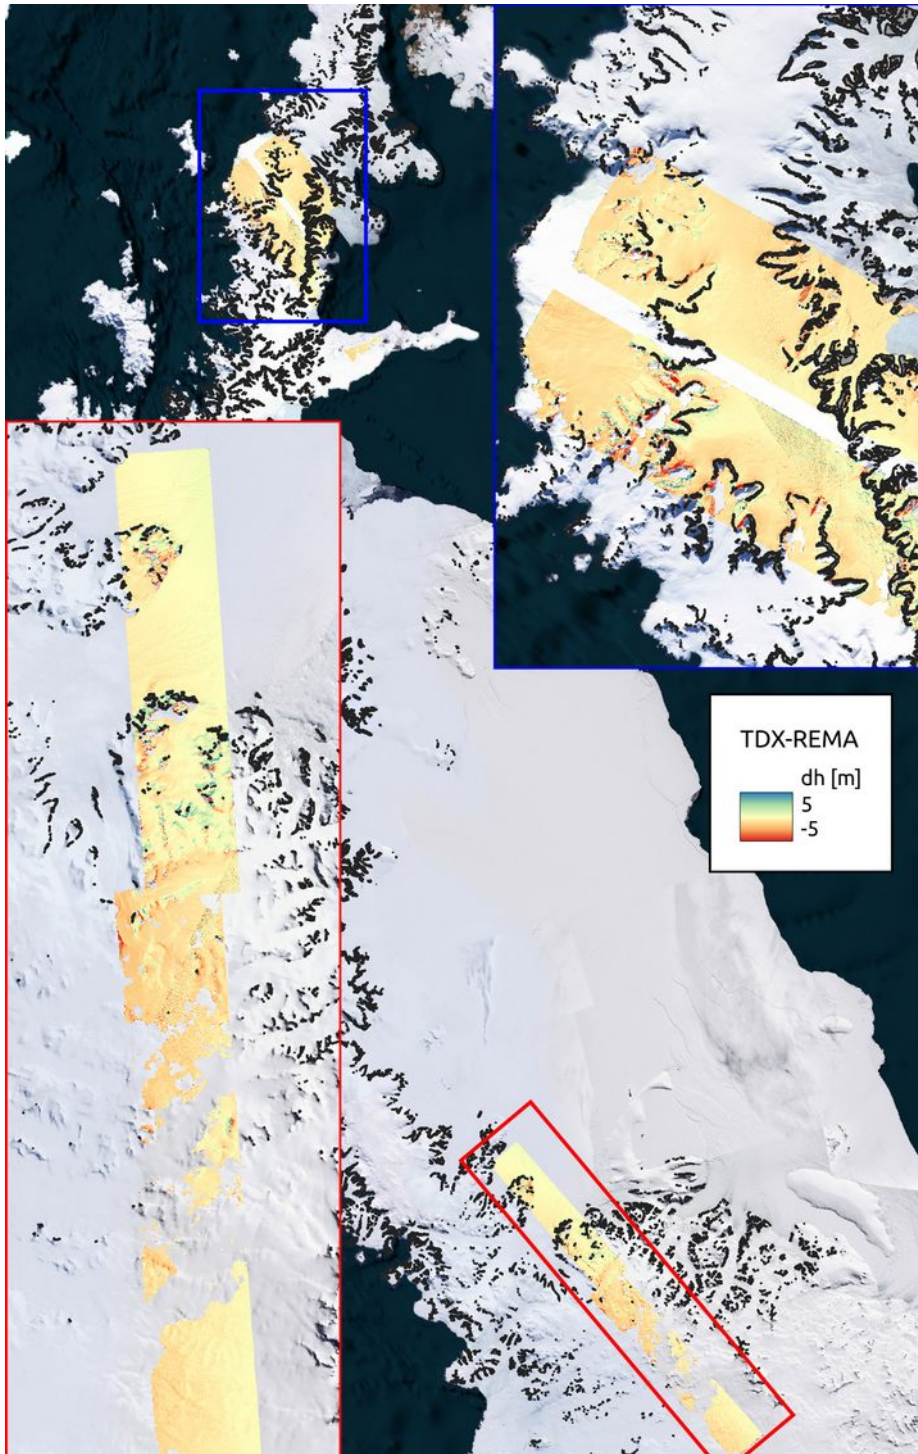

Figure S3: Spatial coverage of elevation differences between contemporaneous TanDEM-X and REMA DEMs for 2013 (blue polygon) and 2017 (red polygon).



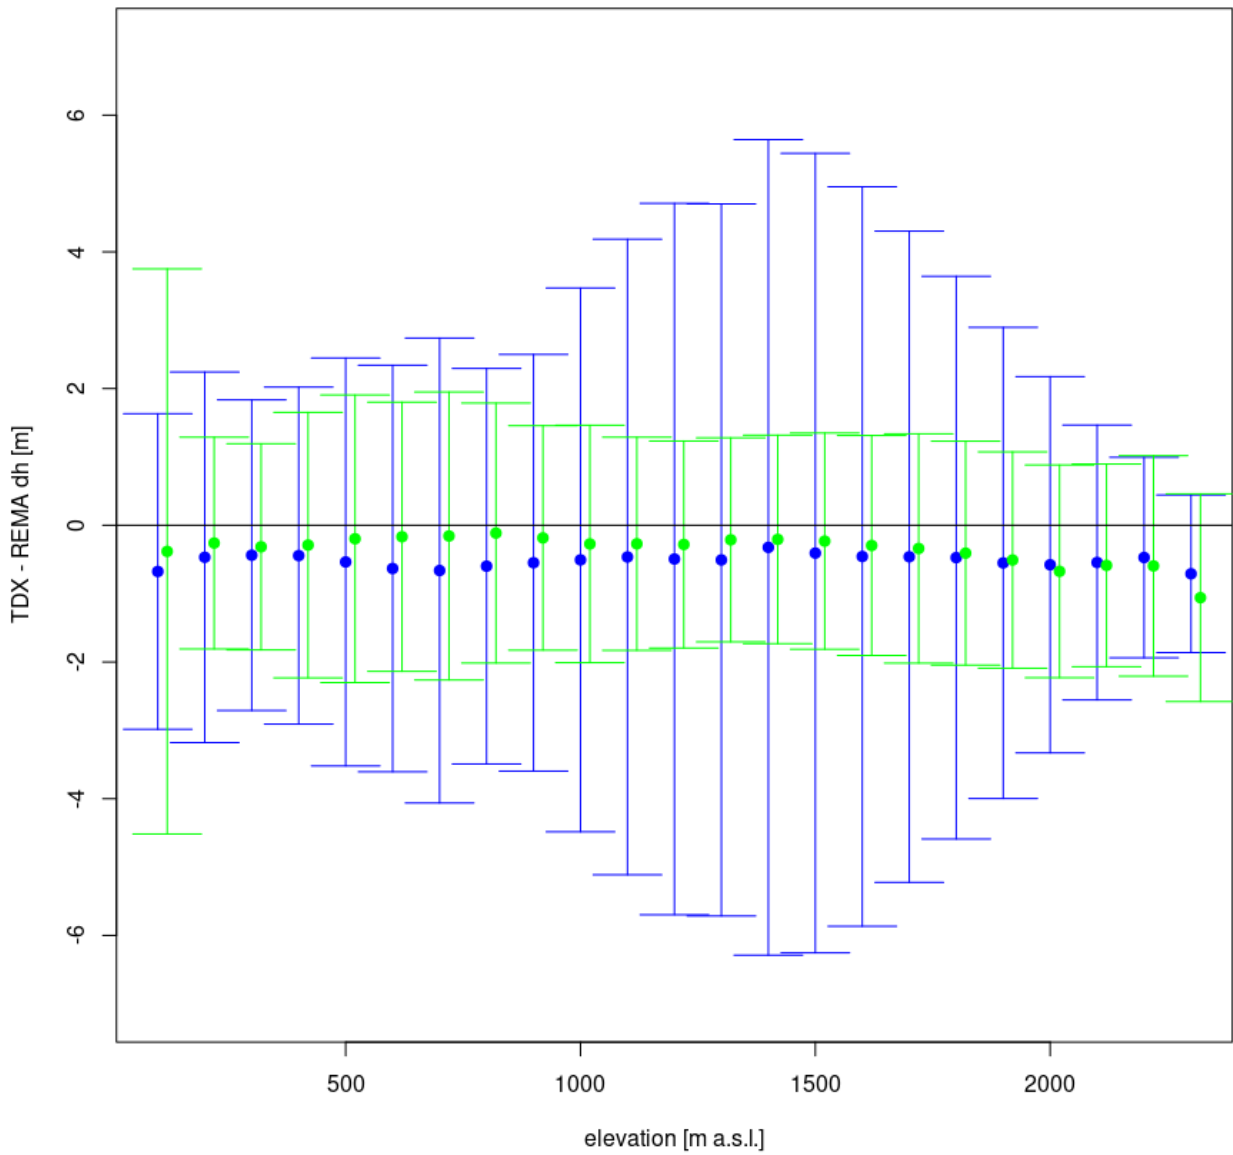

**Figure S4: Hypsometric distribution of differences between contemporaneous TanDEM-X and REMA DEMs for 2013 (blue) and 2017 (green). Whiskers indicate root mean square differences (RMSD) for the respective elevation bin**

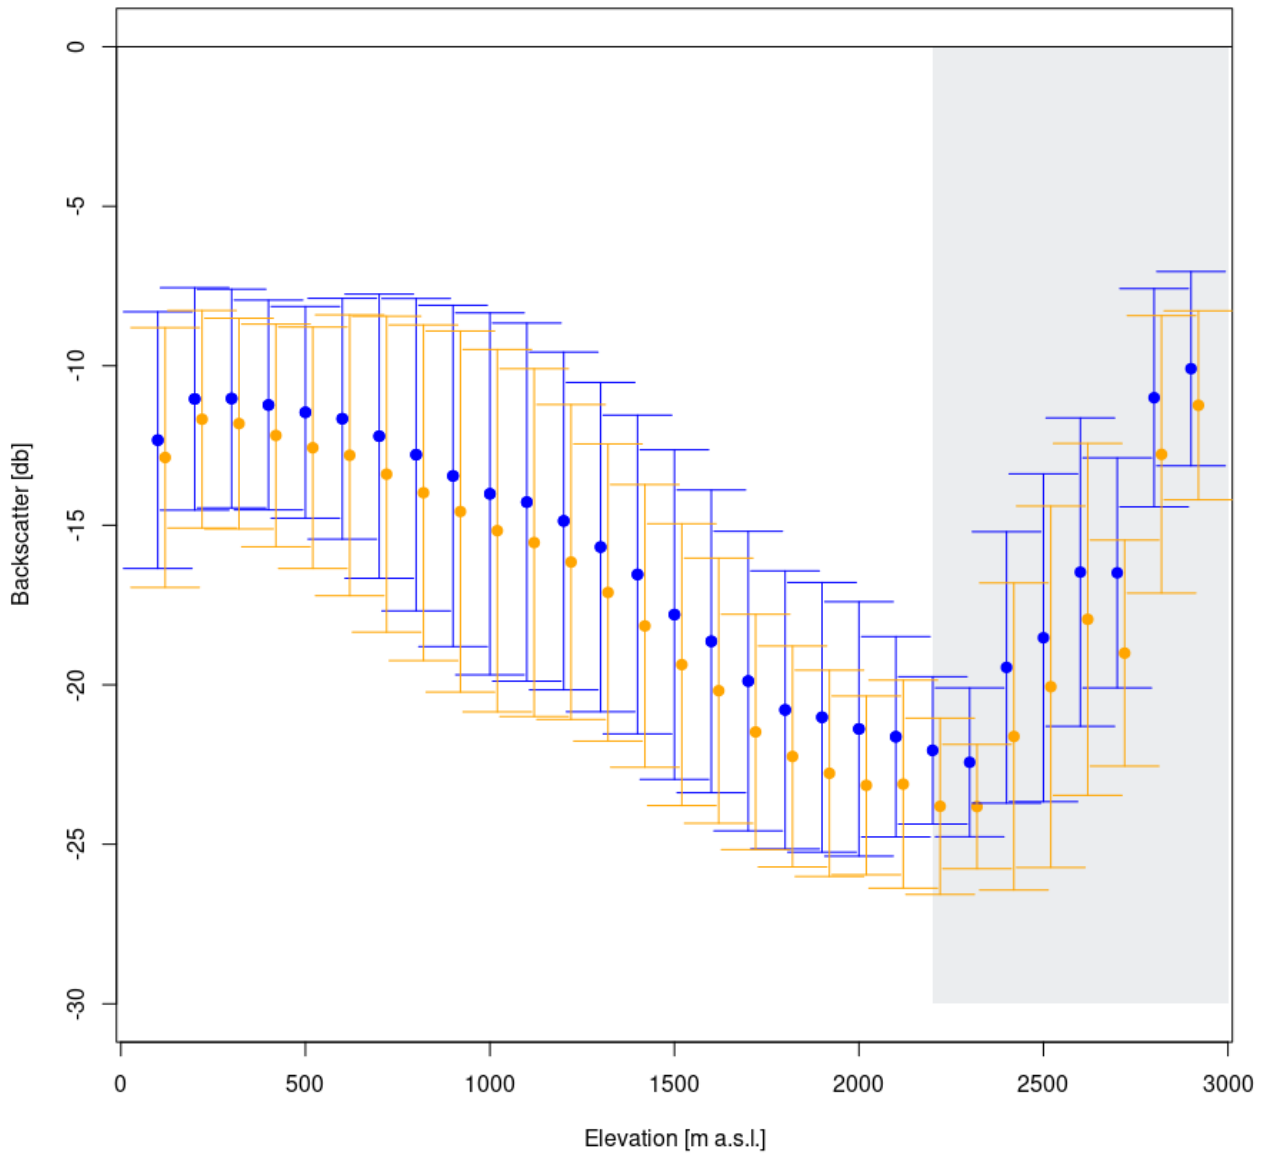

**Figure S5: Hypsometric distribution of SAR backscatter values for 2013 (blue) and 2017 (orange). Whiskers indicate normalized mean absolute deviation (NMAD). The gray area marks the upper 1% quantile of the total glacier area distribution (see Figure 3 in the main manuscript)**
